# Supplementary material for: Powerful Bivariate Genome-Wide Association Analyses Suggest the SOX6 Gene Influencing Both Obesity and Osteoporosis Phenotypes in Males
Source: PLoS One. 2009 Aug 28;4(8):e6827. doi: 10.1371/journal.pone.0006827 (PMC2730014; doi:10.1371/journal.pone.0006827)
Supplement: Appendix S2 — (0.05 MB DOC) [file pone.0006827.s002.doc]

**Appendix S2. The Top 5 SNPs Identified in the Bivariate GWAS in Males**

| Ranking | SNP | Gene | Univariate P value | | Bivariate P value |
| --- | --- | --- | --- | --- | --- |
| BMI | Hip BMD | BMI-hip BMD |
| 1 | **rs297325** | SOX6 | 0.32 | 0.80 | 6.8210-7 |
| 2 | **rs4756846** | SOX6 | 0.07 | 0.12 | 1.4710-6 |
| 3 | rs16933105 | SOX6 | 0.37 | 0.57 | 2.5110-6 |
| 4 | rs556043 | PIGZ | 0.48 | 3.6210-4 | 3.6810-6 |
| 5 | rs11101474 | unknown | 0.97 | 0.77 | 4.1910-6 |

| Ranking | SNP | Gene | Univariate P value | | Bivariate P value |
| --- | --- | --- | --- | --- | --- |
| FM | Hip BMD | FM-hip BMD |
| 1 | rs556043 | PIGZ | 0.044 | 3.6210-4 | 3.9810-7 |
| 2 | **rs297325** | SOX6 | 0.15 | 0.80 | 5.6710-7 |
| 3 | rs7515041 | unknown | 8.2410-4 | 0.015 | 9.8210-7 |
| 4 | rs17032192 | NCK2 | 5.8110-3 | 2.9510-5 | 1.0910-6 |
| 5 | **rs4756846** | SOX6 | 0.11 | 0.12 | 1.2110-6 |

Note:

1. The SNPs are ranked in significance for bivariate association with BMI-hip BMD or FM-hip BMD among all the ~380,000 SNPs tested genome-wide.
2. The two SNPs bolded are the SNPs selected for replication in the FHS cohort.
